# Supplementary material for: The 3.6 ka Aniakchak tephra in the Arctic Ocean: a constraint on theHolocene radiocarbon reservoir age in the Chukchi Sea
Source: Copernicus journal article supplement (doi:10.5194/cp-2016-112), 2016-11-29
Supplement: Supplementary file 1 [file Pearce et al Aniakchak_Supplementary.xlsx]

## Sheet: Table S1. Aniakchak Age
Table S1. Radiocarbon dates associated with Aniakchak CFE II tephra deposits from several sites in Alaska (Supplementary Figure 1). All data compiled by Davies et al.(2016). Table modified from Davies et al.(2016).
	Radiocarbon age		Calibrated age range (2-sigma)
14C Laboratory sample ID	age (yrs BP)	error (yrs)	from (cal yrs BP)	to (cal yrs BP)	Material dated	Stratigraphic context	14C dating method	Location	Coordinates	Reference
CAMS 86531	5295	30	6184	5955	Leaves and plant macros	57cm below tephra	AMS	Arolik Lake	N 59.47°, W 161.12°	Kaufman et al. (2003)
NSRL-11773	4450	60	5290	4878	Vegetation macrofossils	48cm below tephra	AMS	Waskey Lake	N 59°52'46", W 159'12'24"	Levy et al. (2004)
NRSL 11549	4360	35	5038	4850	Twig	22cm below tephra	AMS	Nimgun Lake	N 59.56°, W 160.77°	Kaufman et al.(2012)
NSRL 12336	3630	85	4223	3700	Wood	1cm below tephra	AMS	Sunday Pond	N 59.67°, W 159.47°	Kaufman et al.(2012)
UCIAMS 37822	3575	20	3959	3832	Leaf fragments	10cm below tephra	AMS	Lone Spruce Pond	N 60.01°, W 159.14°	Kaufman et al.(2012)
1-14,226	3520	40	3900	3652	Charcoal	In pumice at base of tuff	nd	King Salmon River	N 57°30.1', W 157°31.2'	Miller & Smith (1987)
1-14,221	3410	90	3887	3453	Charcoal log in tuff	In ashflow tuff	nd	Port Heiden Quarry	N 56°56.3', W 158°37.2'	Miller & Smith (1987)
W-3125	3350	0	3614	3569	Charcoal twigs	At base of ashflow tuff	nd	Waterfall Creek	N 56°48.2', W 158°07.1'	Miller & Smith (1987)
GrA-28712	3335	40	3685	3465	Cyperaceous macrofossils	5-10mm below tephra	AMS	northern Seward Peninsula	N 66°28′22″, W 163°56′56″	Blackford et al. (2014)
GrA-28711	3305	40	3633	3450	Cyperaceous macrofossils	10-15mm below tephra	AMS	northern Seward Peninsula	N 66°28′22″, W 163°56′56″	Blackford et al. (2014)
GrA-28718	3270	40	3581	3398	Cyperaceous macrofossils	0-5mm below tephra	AMS	northern Seward Peninsula	N 66°28′22″, W 163°56′56″	Blackford et al. (2014)
NSRL-11772	3140	35	3448	3251	Vegetation macrofossils	8cm above tephra	AMS	Waskey Lake	N 59°52'46", W 159'12'24"	Levy et al. (2004)
GrA-28720	3065	35	3364	3179	Cyperaceous macrofossils	0-5mm above tephra	AMS	northern Seward Peninsula	N 66°28′22″, W 163°56′56″	Blackford et al. (2014)
GrA-28722	3040	40	3361	3083	Cyperaceous macrofossils	5-10mm above tephra	AMS	northern Seward Peninsula	N 66°28′22″, W 163°56′56″	Blackford et al. (2014)
GrA-28723	2990	35	3332	3060	Cyperaceous macrofossils	10-15mm above tephra	AMS	northern Seward Peninsula	N 66°28′22″, W 163°56′56″	Blackford et al. (2014)
UCIAMS 37821	2875	15	3061	2953	Leaf fragments	~15cm above tephra	AMS	Lone Spruce Pond	N 60.01°, W 159.14°	Kaufman et al.(2012)
NSRL-11364	2590	85	2860	2379	Wood	16cm above tephra	AMS	Arolik Lake	N 59.47°, W 161.12°	Kaufman et al.(2003)
References
Blackford, J. J., Payne, R. J., Heggen, M. P., de la Riva Caballero, A. and van der Plicht, J.: Age and impacts of the caldera-forming Aniakchak II eruption in western Alaska, Quaternary Research, 82(1), 85–95, doi:10.1016/j.yqres.2014.04.013, 2014.
Davies, L. J., Jensen, B. J. L., Froese, D. G. and Wallace, K. L.: Late Pleistocene and Holocene tephrostratigraphy of interior Alaska and Yukon: Key beds and chronologies over the past 30,000 years, Quaternary Science Reviews, 146, 28–53, doi:10.1016/j.quascirev.2016.05.026, 2016.
Kaufman, D. S., Jensen, B. J. L., Reyes, A. V., Schiff, C. J., Froese, D. G. and Pearce, N. J. G.: Late Quaternary tephrostratigraphy, Ahklun Mountains, SW Alaska, J. Quaternary Sci., 27(4), 344–359, doi:10.1002/jqs.1552, 2012.
Kaufman, D. S., Hu, F. S., Briner, J. P., Werner, A., Finney, B. P. and Gregory-Eaves, I.: A ∼33,000 year record of environmental change from Arolik Lake, Ahklun Mountains, Alaska, USA, Journal of Paleolimnology, 30(4), 343–361, doi:10.1023/B:JOPL.0000007219.15604.27, 2003.
Levy, L. B., Kaufman, D. S. and Werner, A.: Holocene glacier fluctuations, Waskey Lake, northeastern Ahklun Mountains, southwestern Alaska, The Holocene, 14(2), 185–193, doi:10.1191/0959683604hl675rp, 2004.
Miller, T. P. and Smith, R. L.: Late Quaternary caldera-forming eruptions in the eastern Aleutian arc, Alaska, Geology, 15(5), 434–438, doi:10.1130/0091-7613(1987)15<434:LQCEIT>2.0.CO;2, 1987.

## Sheet: Table S2. Tephra concentrations
Table S2. Tephra concentrations in core 2PC.
Section	From (cm)	To (cm)	Total core depth of mid-point (cm)	Tephra concentration (shards/g dry sed.)
5	0	5	548.5	7457
5	5	10	553.5	36122
5	10	15	558.5	43630
5	15	20	563.5	867
5	20	25	568.5	9369
5	25	30	573.5	18738
5	30	35	578.5	55750
5	35	40	583.5	8392
5	40	45	588.5	19663
5	45	50	593.5	4057
5	50	55	598.5	2059
5	55	60	603.5	10888
5	60	65	608.5	7846
5	65	70	613.5	15971
5	70	75	618.5	29944
5	75	80	623.5	20135
5	80	85	628.5	16595
5	85	90	633.5	53406
5	90	95	638.5	27889
5	95	100	643.5	13401
5	100	105	648.5	17835
5	105	110	653.5	75783
5	110	115	658.5	46818
5	115	120	663.5	27441
5	120	125	668.5	73118
5	125	128	672.5	50228
6	0	5	676.5	18133
6	5	10	681.5	33061
6	10	15	686.5	40261
6	15	20	691.5	7100
6	20	25	696.5	32136
6	25	30	701.5	8413
6	30	35	706.5	11094
6	35	40	711.5	12730
6	40	45	716.5	174
6	45	50	721.5	1901
6	50	55	726.5	2314
6	55	60	731.5	4784
6	60	65	736.5	622
6	65	70	741.5	944
6	70	75	746.5	640
6	75	80	751.5	1659
6	80	85	756.5	1575
6	85	90	761.5	981
6	90	95	766.5	1374
6	95	100	771.5	2710
6	100	105	776.5	771
6	105	110	781.5	2035
6	110	115	786.5	666
6	115	120	791.5	1629
6	120	125	796.5	1767
6	125	130	801.5	2688
6	130	135	806.5	1564
6	135	140	811.5	2050
6	140	145	816.5	2118
6	145	150	821.5	4106

## Sheet: Table S3. EPMA data
Table S3. Major element oxide geochemistry of tephra shards from four depths in core 2PC (all data normalized to 100%)
Core Depth (cm)	Sample code	Na2O	SiO2	Al2O3	MgO	K2O	CaO	TiO2	P2O5	FeO	MnO	Total oxide percentage of measurement, before normalization (%)
623.5	TP7-1	4.82113	72.3791	14.66	0.466284	2.84509	1.81051	0.460594	0.0573156	2.29676	0.203295	96.6578
	TP7-3	4.84115	71.7897	14.9786	0.463943	2.824	1.79991	0.352949	0.199542	2.60677	0.143372	96.6713
	TP7-4	4.59859	72.0747	15.0882	0.712632	2.88539	1.70318	0.402452	0.0286536	2.45459	0.0514962	99.8131
	TP7-6	4.78289	72.0807	15.2378	0.525914	2.96376	1.73738	0.405422	0.0668379	2.12573	0.0734808	97.8487
	TP7-7	4.55141	72.2561	15.0803	0.490844	2.90279	1.75988	0.431372	0.131182	2.24536	0.150702	98.8705
	TP7-9	4.7536	72.2383	14.7639	0.501438	2.89528	1.71458	0.437885	0.112936	2.3922	0.189836	97.3999
	TP7-10	5.17049	71.7203	14.9157	0.447167	2.86801	1.78745	0.50079	0.108257	2.38327	0.0985625	99.0235
	TP7-11	4.69744	71.6939	15.3983	0.531885	2.87534	1.8853	0.359365	0.104587	2.25393	0.199905	94.9453
	TP7-15	4.91843	72.0124	14.9213	0.499625	2.9054	1.75362	0.485202	0.142053	2.31394	0.0479391	96.3723
	TP7-17	4.60621	71.7697	14.9702	0.526705	3.02931	1.83626	0.5238	0.118475	2.42759	0.191718	96.3917
	mean ± st. dev.	4.77 ± 0.18	72 ± 0.25	15 ± 0.21	0.52 ± 0.07	2.9 ± 0.06	1.78 ± 0.06	0.44 ± 0.06	0.11 ± 0.05	2.35 ± 0.13	0.14 ± 0.06	97.4 ± 1.49
638.5	TP10-1	4.50549	72.4633	14.7545	0.588758	2.95292	1.71493	0.440808	0.0580437	2.34407	0.177074	98.5464
	TP10-2	4.99456	72.3301	14.7309	0.477111	2.86125	1.66822	0.477213	0.0972624	2.26474	0.0985768	98.9077
	TP10-3	4.68434	72.3471	14.9715	0.497418	2.81673	1.51042	0.388525	0.169004	2.52077	0.0785827	97.986
	TP10-4	4.69495	72.3478	14.8191	0.513963	2.91625	1.71666	0.482732	0.0215099	2.28543	0.201552	96.6996
	TP10-5	4.45582	72.5738	14.7751	0.47871	3.03758	1.60875	0.48813	0.0540837	2.39196	0.135897	94.4831
	TP10-7	4.28305	72.3244	14.8092	0.5289	3.03858	1.763	0.471136	0.174329	2.43709	0.170285	96.6307
	TP10-8	4.75004	72.1924	14.8607	0.543513	2.98042	1.67649	0.469933	0.0373587	2.26636	0.222807	98.2036
	TP10-9	4.89799	72.2275	14.7449	0.542241	2.90213	1.62927	0.464545	0.166287	2.36244	0.0627268	97.2318
	TP10-11	4.99246	72.3496	14.5973	0.570229	2.95849	1.58197	0.418606	0.0214696	2.38323	0.126558	97.3468
	TP10-12	4.68084	71.8732	15.0078	0.588997	2.90607	1.69175	0.461545	0.0690191	2.65697	0.0638297	96.3502
	mean ± st. dev.	4.69 ± 0.23	72.3 ± 0.19	14.81 ± 0.12	0.53 ± 0.04	2.94 ± 0.07	1.66 ± 0.07	0.46 ± 0.03	0.09 ± 0.06	2.39 ± 0.12	0.13 ± 0.06	97.24 ± 1.29
686.5	TP20-2	5.19739	71.5804	14.8439	0.430959	2.98294	1.70887	0.467765	0.0637034	2.54814	0.175943	98.8958
	TP20-6	4.94499	71.9475	14.8656	0.547729	2.79943	1.59384	0.440043	0.114123	2.5951	0.151517	97.8769
	TP20-7	4.74579	72.1134	14.9271	0.6081	2.91336	1.85302	0.415797	0.0764886	2.12068	0.226171	97.1387
	TP20-8	4.73127	72.5944	14.6493	0.513296	3.01269	1.69787	0.413597	0	2.3294	0.0581832	96.5915
	TP20-11	4.92154	71.5982	15.2773	0.484977	3.05546	1.74305	0.457396	0.0488053	2.2352	0.177996	97.5304
	TP20-13	5.11637	71.9702	15.1986	0.56902	2.84911	1.50481	0.36898	0.0922953	2.187	0.143459	99.6801
	TP20-16	4.9862	72.0947	14.9073	0.534837	2.83167	1.61077	0.404436	0.117781	2.32895	0.18334	97.469
	TP20-17	4.92038	71.8708	15.042	0.50837	2.94391	1.69561	0.406737	0.0613747	2.44459	0.106209	96.1308
	TP20-20	4.63167	71.8983	15.1117	0.603447	2.96509	1.66658	0.451103	0.199479	2.31073	0.161751	97.8048
	TP20-21	4.72937	72.2566	14.805	0.544186	2.90959	1.83006	0.408165	0.0601453	2.21047	0.246441	97.2645
	mean ± st. dev.	4.89 ± 0.18	71.99 ± 0.3	14.96 ± 0.19	0.53 ± 0.05	2.93 ± 0.08	1.69 ± 0.11	0.42 ± 0.03	0.08 ± 0.05	2.33 ± 0.16	0.16 ± 0.05	97.64 ± 1.03
711.5	TP25-1	4.67972	71.5758	15.4607	0.568207	3.06101	1.7536	0.395026	0.110819	2.1894	0.205659	96.3734
	TP25-2	4.64	71.38	15.52	0.5596	2.9	1.87	0.513	0.0547	2.35	0.2161	94.0534
	TP25-3	3.74	71.94	15.37	0.5887	3.14	1.9	0.4637	0.1332	2.56	0.1706	97.7357
	TP25-8	4.02	71.61	15.34	0.6131	3.26	1.85	0.5256	0.1275	2.52	0.1351	96.4011
	TP25-9	4.76	71.72	15.09	0.5043	3.06	1.75	0.4429	0.0904	2.51	0.0653	95.8572
	TP25-10	5.18	71.53	15	0.5187	2.94	1.87	0.4473	0.0889	2.35	0.0654	95.7225
	TP25-12	4.2	71.59	15.46	0.5805	3.09	1.82	0.4535	0.197	2.45	0.1677	96.5098
	TP25-13	4.92	71.45	15.19	0.5472	3.26	1.7	0.3589	0.0649	2.37	0.1471	95.7809
	TP25-14	4.57	71.34	15.25	0.4931	3.06	1.92	0.4996	0.1759	2.6	0.0985	95.3583
	TP25-15	5.14	71.65	14.87	0.5077	2.97	1.81	0.4546	0.0787	2.42	0.0972	96.6604
	mean ± st. dev.	4.58 ± 0.47	71.58 ± 0.17	15.26 ± 0.22	0.55 ± 0.04	3.07 ± 0.12	1.82 ± 0.07	0.46 ± 0.05	0.11 ± 0.05	2.43 ± 0.12	0.14 ± 0.05	96.05 ± 0.96
Overall mean ± st. dev		4.74 ± 0.3	71.97 ± 0.34	15.01 ± 0.24	0.53 ± 0.05	2.96 ± 0.11	1.74 ± 0.1	0.44 ± 0.04	0.1 ± 0.05	2.38 ± 0.13	0.14 ± 0.06	97.08 ± 1.32

## Sheet: Table S4. Grain Size data
Table S4. Grain size distribution in core 2PC, from 646 - 747 cm depth.
Depth (cm)	Clay (<2 µm)	Fine silt (<10 µm)	Sortable silt (<63 µm)	Very fine sand (< 125 µm)	Fine sand (< 250 µm)	Medium sand (< 500 µm)	Coarse sand (< 2 mm)
646.5	11.0749	47.1732	39.1979	2.2714	0.282678	0	0
647.5	8.7917	51.4805	37.4018	1.93643	0.389653	0	0
648.5	8.17814	52.1276	37.5065	1.93401	0.253755	0	0
649.5	8.64446	52.8548	36.2902	1.89829	0.31225	0	0
650.5	8.80609	51.7066	37.3106	1.93327	0.243432	0	0
651.5	8.80595	53.8	35.6594	1.53895	0.195609	0	0
652.5	7.78424	50.4373	39.3475	2.05515	0.37584	0	0
653.5	7.57843	51.157	39.2245	1.65495	0.385023	0	0
654.5	7.66033	51.2689	38.85	1.75602	0.464729	0	0
655.5	8.24869	51.9121	37.9178	1.7452	0.176243	0	0
656.5	8.05116	51.8428	37.9864	1.75088	0.368793	0	0
657.5	8.06434	52.172	37.6403	1.79634	0.327004	0	0
658.5	8.17697	51.648	37.571	1.82835	0.676163	0.0995541	0
659.5	7.90713	51.3076	37.8143	1.86455	0.73757	0.368818	0
660.5	8.54962	52.4454	37.3679	1.59553	0.0415907	0	0
661.5	8.0498	52.576	37.3943	1.57313	0.406774	0	0
662.5	9.34807	51.7447	37.2108	1.50519	0.191203	0	0
663.5	8.8824	51.3889	37.6117	1.66798	0.448779	0.000239758	0
664.5	8.40205	51.7949	37.7859	1.6037	0.413439	0	0
665.5	8.99628	51.2729	38.5346	1.19456	0.00164536	0	0
666.5	9.32717	50.8382	38.2279	1.50635	0.100379	0	0
667.5	7.94088	52.3308	37.933	1.49714	0.298198	0	0
668.5	9.98228	47.7676	39.6357	1.84121	0.77325	0	0
669.5	8.76052	48.1219	40.4037	1.76383	0.771402	0.178681	0
670.5	10.3667	48.23	39.3168	1.72343	0.363155	0	0
671.5	9.84132	47.8675	39.6611	1.9587	0.591774	0.0793416	0.000297565
672.5	10.2633	48.9584	37.2432	1.60577	0.736511	0.967151	0.225644
673.5	12.7448	46.3357	39.4722	1.37781	0.0695885	0	0
674.5	9.98859	51.7841	36.6413	1.49917	0.0868012	0	0
675.5	9.00697	51.3033	37.6063	1.83258	0.250827	0	0
676.5	11.8478	49.7462	37.181	1.18449	0.0405263	0	0
677.5	11.5552	49.7128	37.224	1.41005	0.0980145	0	0
678.5	12.4142	48.3418	37.6054	1.50853	0.130047	0	0
679.5	13.3327	48.065	37.6807	0.921655	0	0	0
680.5	12.3969	49.3787	37.2632	0.96125	0	0	0
681.5	9.92972	50.5044	37.6667	1.64846	0.250723	0	0
682.5	9.53125	51.6244	36.8547	1.72126	0.268341	0	0
683.5	11.4499	50.3862	36.9091	1.25359	0.00119185	0	0
684.5	10.9131	52.1852	35.801	1.10029	0.000404495	0	0
685.5	11.5067	51.2902	35.898	1.27835	0.0267982	0	0
686.5	13.3412	47.8779	37.7781	1.00223	0.000626012	0	0
687.5	13.3183	48.5464	37.3481	0.787279	0	0	0
688.5	12.7408	45.9601	39.6751	1.62246	0.00152821	0	0
689.5	10.9525	51.0045	36.2566	1.61116	0.175336	0	0
690.5	10.1338	53.5501	34.8394	1.34829	0.128407	0	0
691.5	10.2548	51.9419	35.8865	1.70462	0.212114	0	0
692.5	11.6559	50.789	36.1865	1.34227	0.0262863	0	0
693.5	10.9896	49.9402	37.3312	1.63269	0.106241	0	0
694.5	12.3845	47.6841	38.7101	1.22027	0.00108031	0	0
695.5	11.2286	48.339	38.9084	1.52208	0.00182821	0	0
696.5	11.797	47.8177	38.8986	1.45922	0.0274704	0	0
697.5	13.0643	45.8955	40.0532	0.987016	0	0	0
698.5	12.6732	45.4796	40.5409	1.30528	0.00111265	0	0
699.5	12.1541	47.8876	38.1597	1.68615	0.112462	0	0
700.5	9.80216	49.3609	38.624	2.02933	0.183574	0	0
701.5	11.8964	48.7903	37.3254	1.7507	0.237218	0	0
702.5	11.8995	46.0231	39.596	2.15749	0.323823	0	0
703.5	11.7079	46.6376	39.5599	1.99301	0.101589	0	0
704.5	10.3359	46.4126	40.4472	2.58979	0.214441	0	0
705.5	10.3828	46.0105	40.4098	2.75105	0.445877	0	0
706.5	11.809	43.9185	42.0797	2.14476	0.047985	0	0
707.5	11.9172	44.1754	41.6816	2.07601	0.149767	0	0
708.5	10.68	44.8216	41.8682	2.47359	0.156583	0	0
709.5	10.6152	47.1747	39.9597	2.08337	0.167037	0	0
710.5	11.4217	44.0991	42.3612	2.03627	0.081779	0	0
711.5	11.5054	42.3658	43.7593	2.29379	0.075728	0	0
712.5	10.8903	44.5078	40.2404	3.30671	0.949628	0.105122	0
713.5	11.3856	43.8323	42.1764	2.4364	0.169254	0	0
714.5	12.1887	43.2852	43.0309	1.49422	0.00101735	0	0
715.5	11.0027	47.3043	39.7874	1.83382	0.0718834	0	0
717.5	12.0991	46.8906	39.9748	1.03558	0	0	0
719.5	12.6969	47.8323	37.6994	1.71184	0.0595797	0	0
721.5	13.0326	47.8625	37.9157	1.18836	0.000883674	0	0
723.5	11.6082	46.672	39.6824	1.91618	0.12117	0	0
725.5	11.8379	50.2355	36.5876	1.31215	0.026886	0	0
727.5	13.2329	47.2457	38.4009	1.11948	0.00105296	0	0
729.5	13.3654	48.6133	37.1686	0.852745	0	0	0
731.5	13.7551	47.4728	37.7621	1.00944	0.000489805	0	0
733.5	12.3994	49.404	37.0204	1.17489	0.0013109	0	0
735.5	13.2703	49.3591	36.4004	0.969798	0.000395095	0	0
737.5	13.4767	49.6942	35.8987	0.929458	0.000976232	0	0
739.5	12.9224	50.4866	35.2656	1.22111	0.104314	0	0
741.5	13.3164	50.4973	35.4294	0.756878	0	0	0
743.5	11.6265	48.0098	39.22	1.1426	0.00114223	0	0
745.5	12.1666	50.9673	35.5271	1.25152	0.0875051	0	0
746.5	10.767	52.3777	35.4182	1.3095	0.127559	0	0

## Sheet: Table S5. Chronology of 2PC
Table S5. Age-depth relationship for core 2PC.
Depth (cm)	Age (cal yrs BP)	Error (yrs)
0	-45.1	14
0.1	-44.8	14.1
0.2	-44.6	14.1
0.3	-44.3	14.1
0.4	-44.1	14.2
0.5	-43.8	14.2
0.6	-43.6	14.2
0.7	-43.3	14.3
0.8	-43	14.3
0.9	-42.8	14.4
1	-42.5	14.4
1.1	-42.3	14.4
1.2	-42	14.5
1.3	-41.8	14.5
1.4	-41.5	14.5
1.5	-41.2	14.6
1.6	-41	14.6
1.7	-40.7	14.6
1.8	-40.5	14.7
1.9	-40.2	14.7
2	-39.9	14.8
2.1	-39.7	14.8
2.2	-39.4	14.8
2.3	-39.2	14.9
2.4	-38.9	14.9
2.5	-38.7	14.9
2.6	-38.4	15
2.7	-38.2	15
2.8	-37.9	15.1
2.9	-37.6	15.1
3	-37.4	15.1
3.1	-37.1	15.2
3.2	-36.9	15.2
3.3	-36.6	15.3
3.4	-36.4	15.3
3.5	-36.1	15.3
3.6	-35.9	15.4
3.7	-35.6	15.4
3.8	-35.4	15.5
3.9	-35.1	15.5
4	-34.9	15.5
4.1	-34.6	15.6
4.2	-34.4	15.6
4.3	-34.1	15.7
4.4	-33.8	15.7
4.5	-33.6	15.7
4.6	-33.3	15.8
4.7	-33.1	15.8
4.8	-32.8	15.8
4.9	-32.6	15.9
5	-32.3	15.9
5.1	-32.1	16
5.2	-31.8	16
5.3	-31.6	16
5.4	-31.3	16.1
5.5	-31.1	16.1
5.6	-30.8	16.2
5.7	-30.5	16.2
5.8	-30.3	16.2
5.9	-30	16.3
6	-29.8	16.3
6.1	-29.5	16.4
6.2	-29.3	16.4
6.3	-29	16.4
6.4	-28.8	16.5
6.5	-28.5	16.5
6.6	-28.3	16.6
6.7	-28	16.6
6.8	-27.8	16.6
6.9	-27.5	16.7
7	-27.3	16.7
7.1	-27	16.8
7.2	-26.7	16.8
7.3	-26.5	16.8
7.4	-26.2	16.9
7.5	-26	16.9
7.6	-25.7	17
7.7	-25.5	17
7.8	-25.2	17
7.9	-25	17.1
8	-24.7	17.1
8.1	-24.5	17.2
8.2	-24.2	17.2
8.3	-24	17.2
8.4	-23.7	17.3
8.5	-23.5	17.3
8.6	-23.2	17.4
8.7	-22.9	17.4
8.8	-22.7	17.4
8.9	-22.4	17.5
9	-22.2	17.5
9.1	-21.9	17.6
9.2	-21.7	17.6
9.3	-21.4	17.6
9.4	-21.2	17.7
9.5	-20.9	17.7
9.6	-20.7	17.7
9.7	-20.4	17.8
9.8	-20.2	17.8
9.9	-19.9	17.9
10	-19.6	17.9
10.1	-19.4	17.9
10.2	-19.1	18
10.3	-18.9	18
10.4	-18.6	18.1
10.5	-18.4	18.1
10.6	-18.1	18.1
10.7	-17.7	18.1
10.8	-17.4	18.2
10.9	-17.1	18.2
11	-16.7	18.2
11.1	-16.4	18.2
11.2	-16.1	18.3
11.3	-15.7	18.3
11.4	-15.4	18.3
11.5	-15.1	18.3
11.6	-14.8	18.4
11.7	-14.4	18.4
11.8	-14.1	18.4
11.9	-13.8	18.4
12	-13.4	18.4
12.1	-13.1	18.5
12.2	-12.8	18.5
12.3	-12.4	18.5
12.4	-12.1	18.5
12.5	-11.8	18.6
12.6	-11.5	18.6
12.7	-11.1	18.6
12.8	-10.8	18.6
12.9	-10.5	18.7
13	-10.1	18.7
13.1	-9.8	18.7
13.2	-9.5	18.7
13.3	-9.2	18.7
13.4	-8.8	18.8
13.5	-8.5	18.8
13.6	-8.2	18.8
13.7	-7.8	18.8
13.8	-7.5	18.9
13.9	-7.2	18.9
14	-6.8	18.9
14.1	-6.5	18.9
14.2	-6.2	18.9
14.3	-5.9	19
14.4	-5.5	19
14.5	-5.2	19
14.6	-4.9	19
14.7	-4.5	19.1
14.8	-4.2	19.1
14.9	-3.9	19.1
15	-3.6	19.1
15.1	-3.2	19.2
15.2	-2.9	19.2
15.3	-2.6	19.2
15.4	-2.2	19.2
15.5	-1.9	19.2
15.6	-1.6	19.3
15.7	-1.2	19.3
15.8	-0.9	19.3
15.9	-0.6	19.3
16	-0.3	19.4
16.1	0.1	19.4
16.2	0.4	19.4
16.3	0.7	19.4
16.4	1.1	19.4
16.5	1.4	19.5
16.6	1.7	19.5
16.7	2.1	19.5
16.8	2.4	19.5
16.9	2.7	19.6
17	3	19.6
17.1	3.4	19.6
17.2	3.7	19.6
17.3	4	19.7
17.4	4.4	19.7
17.5	4.7	19.7
17.6	5	19.7
17.7	5.3	19.7
17.8	5.7	19.8
17.9	6	19.8
18	6.3	19.8
18.1	6.7	19.8
18.2	7	19.9
18.3	7.3	19.9
18.4	7.7	19.9
18.5	8	19.9
18.6	8.3	19.9
18.7	8.6	20
18.8	9	20
18.9	9.3	20
19	9.6	20
19.1	10	20.1
19.2	10.3	20.1
19.3	10.6	20.1
19.4	11	20.1
19.5	11.3	20.2
19.6	11.6	20.2
19.7	11.9	20.2
19.8	12.3	20.2
19.9	12.6	20.2
20	12.9	20.3
20.1	13.3	20.3
20.2	13.6	20.3
20.3	13.9	20.3
20.4	14.2	20.4
20.5	14.6	20.4
20.6	14.9	20.4
20.7	15.2	20.4
20.8	15.6	20.4
20.9	15.9	20.5
21	16.2	20.5
21.1	16.6	20.5
21.2	16.9	20.5
21.3	17.2	20.6
21.4	17.5	20.6
21.5	17.9	20.6
21.6	18.2	20.6
21.7	18.5	20.7
21.8	18.9	20.7
21.9	19.2	20.7
22	19.5	20.7
22.1	19.8	20.7
22.2	20.2	20.8
22.3	20.5	20.8
22.4	20.8	20.8
22.5	21.2	20.8
22.6	21.5	20.9
22.7	21.8	20.9
22.8	22.2	20.9
22.9	22.5	20.9
23	22.8	20.9
23.1	23.1	21
23.2	23.5	21
23.3	23.8	21
23.4	24.1	21
23.5	24.5	21.1
23.6	24.8	21.1
23.7	25.1	21.1
23.8	25.5	21.1
23.9	25.8	21.2
24	26.1	21.2
24.1	26.4	21.2
24.2	26.8	21.2
24.3	27.1	21.2
24.4	27.4	21.3
24.5	27.8	21.3
24.6	28.1	21.3
24.7	28.4	21.3
24.8	28.7	21.4
24.9	29.1	21.4
25	29.4	21.4
25.1	29.7	21.4
25.2	30.1	21.4
25.3	30.4	21.5
25.4	30.7	21.5
25.5	31.1	21.5
25.6	31.4	21.5
25.7	31.7	21.6
25.8	32	21.6
25.9	32.4	21.6
26	32.7	21.6
26.1	33	21.7
26.2	33.4	21.7
26.3	33.7	21.7
26.4	34	21.7
26.5	34.3	21.7
26.6	34.7	21.8
26.7	35	21.8
26.8	35.3	21.8
26.9	35.7	21.8
27	36	21.9
27.1	36.3	21.9
27.2	36.7	21.9
27.3	37	21.9
27.4	37.3	22
27.5	37.6	22
27.6	38	22
27.7	38.3	22
27.8	38.6	22
27.9	39	22.1
28	39.3	22.1
28.1	39.6	22.1
28.2	40	22.1
28.3	40.3	22.2
28.4	40.6	22.2
28.5	40.9	22.2
28.6	41.3	22.2
28.7	41.6	22.2
28.8	41.9	22.3
28.9	42.3	22.3
29	42.6	22.3
29.1	42.9	22.3
29.2	43.2	22.4
29.3	43.6	22.4
29.4	43.9	22.4
29.5	44.2	22.4
29.6	44.6	22.5
29.7	44.9	22.5
29.8	45.2	22.5
29.9	45.6	22.5
30	45.9	22.5
30.1	46.2	22.6
30.2	46.5	22.6
30.3	46.9	22.6
30.4	47.2	22.6
30.5	47.5	22.7
30.6	47.9	22.7
30.7	48.2	22.7
30.8	48.5	22.7
30.9	48.8	22.7
31	49.2	22.8
31.1	49.5	22.8
31.2	49.8	22.8
31.3	50.2	22.8
31.4	50.5	22.9
31.5	50.8	22.9
31.6	51.2	22.9
31.7	51.5	22.9
31.8	51.8	23
31.9	52.1	23
32	52.5	23
32.1	52.8	23
32.2	53.1	23
32.3	53.5	23.1
32.4	53.8	23.1
32.5	54.1	23.1
32.6	54.5	23.1
32.7	54.8	23.2
32.8	55.1	23.2
32.9	55.4	23.2
33	55.8	23.2
33.1	56.1	23.2
33.2	56.4	23.3
33.3	56.8	23.3
33.4	57.1	23.3
33.5	57.4	23.3
33.6	57.7	23.4
33.7	58.1	23.4
33.8	58.4	23.4
33.9	58.7	23.4
34	59.1	23.5
34.1	59.4	23.5
34.2	59.7	23.5
34.3	60.1	23.5
34.4	60.4	23.5
34.5	60.7	23.6
34.6	61	23.6
34.7	61.4	23.6
34.8	61.7	23.6
34.9	62	23.7
35	62.4	23.7
35.1	62.7	23.7
35.2	63	23.7
35.3	63.3	23.7
35.4	63.7	23.8
35.5	64	23.8
35.6	64.3	23.8
35.7	64.7	23.8
35.8	65	23.9
35.9	65.3	23.9
36	65.7	23.9
36.1	66	23.9
36.2	66.3	24
36.3	66.6	24
36.4	67	24
36.5	67.3	24
36.6	67.6	24
36.7	68	24.1
36.8	68.3	24.1
36.9	68.6	24.1
37	69	24.1
37.1	69.3	24.2
37.2	69.6	24.2
37.3	69.9	24.2
37.4	70.3	24.2
37.5	70.6	24.2
37.6	70.9	24.3
37.7	71.3	24.3
37.8	71.6	24.3
37.9	71.9	24.3
38	72.2	24.4
38.1	72.6	24.4
38.2	72.9	24.4
38.3	73.2	24.4
38.4	73.6	24.5
38.5	73.9	24.5
38.6	74.2	24.5
38.7	74.6	24.5
38.8	74.9	24.5
38.9	75.2	24.6
39	75.5	24.6
39.1	75.9	24.6
39.2	76.2	24.6
39.3	76.5	24.7
39.4	76.9	24.7
39.5	77.2	24.7
39.6	77.5	24.7
39.7	77.8	24.7
39.8	78.2	24.8
39.9	78.5	24.8
40	78.8	24.8
40.1	79.2	24.8
40.2	79.5	24.9
40.3	79.8	24.9
40.4	80.2	24.9
40.5	80.5	24.9
40.6	80.8	25
40.7	81.1	25
40.8	81.5	25
40.9	81.8	25
41	82.1	25
41.1	82.5	25.1
41.2	82.8	25.1
41.3	83.1	25.1
41.4	83.5	25.1
41.5	83.8	25.2
41.6	84.1	25.2
41.7	84.4	25.2
41.8	84.8	25.2
41.9	85.1	25.3
42	85.4	25.3
42.1	85.8	25.3
42.2	86.1	25.3
42.3	86.4	25.3
42.4	86.7	25.4
42.5	87.1	25.4
42.6	87.4	25.4
42.7	87.7	25.4
42.8	88.1	25.5
42.9	88.4	25.5
43	88.7	25.5
43.1	89.1	25.5
43.2	89.4	25.5
43.3	89.7	25.6
43.4	90	25.6
43.5	90.4	25.6
43.6	90.7	25.6
43.7	91	25.7
43.8	91.4	25.7
43.9	91.7	25.7
44	92	25.7
44.1	92.3	25.8
44.2	92.7	25.8
44.3	93	25.8
44.4	93.3	25.8
44.5	93.7	25.8
44.6	94	25.9
44.7	94.3	25.9
44.8	94.7	25.9
44.9	95	25.9
45	95.3	26
45.1	95.6	26
45.2	96	26
45.3	96.3	26
45.4	96.6	26
45.5	97	26.1
45.6	97.3	26.1
45.7	97.6	26.1
45.8	98	26.1
45.9	98.3	26.2
46	98.6	26.2
46.1	98.9	26.2
46.2	99.3	26.2
46.3	99.6	26.3
46.4	99.9	26.3
46.5	100.3	26.3
46.6	100.6	26.3
46.7	100.9	26.3
46.8	101.2	26.4
46.9	101.6	26.4
47	101.9	26.4
47.1	102.2	26.4
47.2	102.6	26.5
47.3	102.9	26.5
47.4	103.2	26.5
47.5	103.6	26.5
47.6	103.9	26.5
47.7	104.2	26.6
47.8	104.5	26.6
47.9	104.9	26.6
48	105.2	26.6
48.1	105.5	26.7
48.2	105.9	26.7
48.3	106.2	26.7
48.4	106.5	26.7
48.5	106.8	26.8
48.6	107.2	26.8
48.7	107.5	26.8
48.8	107.8	26.8
48.9	108.2	26.8
49	108.5	26.9
49.1	108.8	26.9
49.2	109.2	26.9
49.3	109.5	26.9
49.4	109.8	27
49.5	110.1	27
49.6	110.5	27
49.7	110.8	27
49.8	111.1	27
49.9	111.5	27.1
50	111.8	27.1
50.1	112.1	27.1
50.2	112.5	27.1
50.3	112.8	27.2
50.4	113.1	27.2
50.5	113.4	27.2
50.6	113.8	27.2
50.7	114.1	27.3
50.8	114.4	27.3
50.9	114.8	27.3
51	115.1	27.3
51.1	115.4	27.3
51.2	115.7	27.4
51.3	116.1	27.4
51.4	116.4	27.4
51.5	116.7	27.4
51.6	117.1	27.5
51.7	117.4	27.5
51.8	117.7	27.5
51.9	118.1	27.5
52	118.4	27.5
52.1	118.7	27.6
52.2	119	27.6
52.3	119.4	27.6
52.4	119.7	27.6
52.5	120	27.7
52.6	120.4	27.7
52.7	120.7	27.7
52.8	121	27.7
52.9	121.3	27.8
53	121.7	27.8
53.1	122	27.8
53.2	122.3	27.8
53.3	122.7	27.8
53.4	123	27.9
53.5	123.3	27.9
53.6	123.7	27.9
53.7	124	27.9
53.8	124.3	28
53.9	124.6	28
54	125	28
54.1	125.3	28
54.2	125.6	28
54.3	126	28.1
54.4	126.3	28.1
54.5	126.6	28.1
54.6	127	28.1
54.7	127.3	28.2
54.8	127.6	28.2
54.9	127.9	28.2
55	128.3	28.2
55.1	128.6	28.3
55.2	128.9	28.3
55.3	129.3	28.3
55.4	129.6	28.3
55.5	129.9	28.3
55.6	130.2	28.4
55.7	130.6	28.4
55.8	130.9	28.4
55.9	131.2	28.4
56	131.6	28.5
56.1	131.9	28.5
56.2	132.2	28.5
56.3	132.6	28.5
56.4	132.9	28.6
56.5	133.2	28.6
56.6	133.5	28.6
56.7	133.9	28.6
56.8	134.2	28.6
56.9	134.5	28.7
57	134.9	28.7
57.1	135.2	28.7
57.2	135.5	28.7
57.3	135.8	28.8
57.4	136.2	28.8
57.5	136.5	28.8
57.6	136.8	28.8
57.7	137.2	28.8
57.8	137.5	28.9
57.9	137.8	28.9
58	138.2	28.9
58.1	138.5	28.9
58.2	138.8	29
58.3	139.1	29
58.4	139.5	29
58.5	139.8	29
58.6	140.1	29.1
58.7	140.5	29.1
58.8	140.8	29.1
58.9	141.1	29.1
59	141.5	29.1
59.1	141.8	29.2
59.2	142.1	29.2
59.3	142.4	29.2
59.4	142.8	29.2
59.5	143.1	29.3
59.6	143.4	29.3
59.7	143.8	29.3
59.8	144.1	29.3
59.9	144.4	29.3
60	144.7	29.4
60.1	145.1	29.4
60.2	145.4	29.4
60.3	145.7	29.4
60.4	146.1	29.5
60.5	146.4	29.5
60.6	146.7	29.5
60.7	147.1	29.5
60.8	147.4	29.6
60.9	147.7	29.6
61	148	29.6
61.1	148.4	29.6
61.2	148.7	29.6
61.3	149	29.7
61.4	149.4	29.7
61.5	149.7	29.7
61.6	150	29.7
61.7	150.3	29.8
61.8	150.7	29.8
61.9	151	29.8
62	151.3	29.8
62.1	151.7	29.8
62.2	152	29.9
62.3	152.3	29.9
62.4	152.7	29.9
62.5	153	29.9
62.6	153.3	30
62.7	153.6	30
62.8	154	30
62.9	154.3	30
63	154.6	30.1
63.1	155	30.1
63.2	155.3	30.1
63.3	155.6	30.1
63.4	156	30.1
63.5	156.3	30.2
63.6	156.6	30.2
63.7	156.9	30.2
63.8	157.3	30.2
63.9	157.6	30.3
64	157.9	30.3
64.1	158.3	30.3
64.2	158.6	30.3
64.3	158.9	30.3
64.4	159.2	30.4
64.5	159.6	30.4
64.6	159.9	30.4
64.7	160.2	30.4
64.8	160.6	30.5
64.9	160.9	30.5
65	161.2	30.5
65.1	161.6	30.5
65.2	161.9	30.6
65.3	162.2	30.6
65.4	162.5	30.6
65.5	162.9	30.6
65.6	163.2	30.6
65.7	163.5	30.7
65.8	163.9	30.7
65.9	164.2	30.7
66	164.5	30.7
66.1	164.9	30.8
66.2	165.2	30.8
66.3	165.5	30.8
66.4	165.8	30.8
66.5	166.2	30.8
66.6	166.5	30.9
66.7	166.8	30.9
66.8	167.2	30.9
66.9	167.5	30.9
67	167.8	31
67.1	168.1	31
67.2	168.5	31
67.3	168.8	31
67.4	169.1	31.1
67.5	169.5	31.1
67.6	169.8	31.1
67.7	170.1	31.1
67.8	170.5	31.1
67.9	170.8	31.2
68	171.1	31.2
68.1	171.4	31.2
68.2	171.8	31.2
68.3	172.1	31.3
68.4	172.4	31.3
68.5	172.8	31.3
68.6	173.1	31.3
68.7	173.4	31.3
68.8	173.7	31.4
68.9	174.1	31.4
69	174.4	31.4
69.1	174.7	31.4
69.2	175.1	31.5
69.3	175.4	31.5
69.4	175.7	31.5
69.5	176.1	31.5
69.6	176.4	31.6
69.7	176.7	31.6
69.8	177	31.6
69.9	177.4	31.6
70	177.7	31.6
70.1	178	31.7
70.2	178.4	31.7
70.3	178.7	31.7
70.4	179	31.7
70.5	179.4	31.8
70.6	179.7	31.8
70.7	180	31.8
70.8	180.3	31.8
70.9	180.7	31.9
71	181	31.9
71.1	181.3	31.9
71.2	181.7	31.9
71.3	182	31.9
71.4	182.3	32
71.5	182.6	32
71.6	183	32
71.7	183.3	32
71.8	183.6	32.1
71.9	184	32.1
72	184.3	32.1
72.1	184.6	32.1
72.2	185	32.1
72.3	185.3	32.2
72.4	185.6	32.2
72.5	185.9	32.2
72.6	186.3	32.2
72.7	186.6	32.3
72.8	186.9	32.3
72.9	187.3	32.3
73	187.6	32.3
73.1	187.9	32.4
73.2	188.2	32.4
73.3	188.6	32.4
73.4	188.9	32.4
73.5	189.2	32.4
73.6	189.6	32.5
73.7	189.9	32.5
73.8	190.2	32.5
73.9	190.6	32.5
74	190.9	32.6
74.1	191.2	32.6
74.2	191.5	32.6
74.3	191.9	32.6
74.4	192.2	32.6
74.5	192.5	32.7
74.6	192.9	32.7
74.7	193.2	32.7
74.8	193.5	32.7
74.9	193.9	32.8
75	194.2	32.8
75.1	194.5	32.8
75.2	194.8	32.8
75.3	195.2	32.9
75.4	195.5	32.9
75.5	195.8	32.9
75.6	196.2	32.9
75.7	196.5	32.9
75.8	196.8	33
75.9	197.1	33
76	197.5	33
76.1	197.8	33
76.2	198.1	33.1
76.3	198.5	33.1
76.4	198.8	33.1
76.5	199.1	33.1
76.6	199.5	33.1
76.7	199.8	33.2
76.8	200.1	33.2
76.9	200.4	33.2
77	200.8	33.2
77.1	201.1	33.3
77.2	201.4	33.3
77.3	201.8	33.3
77.4	202.1	33.3
77.5	202.4	33.4
77.6	202.7	33.4
77.7	203.1	33.4
77.8	203.4	33.4
77.9	203.7	33.4
78	204.1	33.5
78.1	204.4	33.5
78.2	204.7	33.5
78.3	205.1	33.5
78.4	205.4	33.6
78.5	205.7	33.6
78.6	206	33.6
78.7	206.4	33.6
78.8	206.7	33.6
78.9	207	33.7
79	207.4	33.7
79.1	207.7	33.7
79.2	208	33.7
79.3	208.4	33.8
79.4	208.7	33.8
79.5	209	33.8
79.6	209.3	33.8
79.7	209.7	33.9
79.8	210	33.9
79.9	210.3	33.9
80	210.7	33.9
80.1	211	33.9
80.2	211.3	34
80.3	211.6	34
80.4	212	34
80.5	212.3	34
80.6	212.6	34.1
80.7	213	34.1
80.8	213.3	34.1
80.9	213.6	34.1
81	214	34.1
81.1	214.3	34.2
81.2	214.6	34.2
81.3	214.9	34.2
81.4	215.3	34.2
81.5	215.6	34.3
81.6	215.9	34.3
81.7	216.3	34.3
81.8	216.6	34.3
81.9	216.9	34.4
82	217.2	34.4
82.1	217.6	34.4
82.2	217.9	34.4
82.3	218.2	34.4
82.4	218.6	34.5
82.5	218.9	34.5
82.6	219.2	34.5
82.7	219.6	34.5
82.8	219.9	34.6
82.9	220.2	34.6
83	220.5	34.6
83.1	220.9	34.6
83.2	221.2	34.6
83.3	221.5	34.7
83.4	221.9	34.7
83.5	222.2	34.7
83.6	222.5	34.7
83.7	222.9	34.8
83.8	223.2	34.8
83.9	223.5	34.8
84	223.8	34.8
84.1	224.2	34.9
84.2	224.5	34.9
84.3	224.8	34.9
84.4	225.2	34.9
84.5	225.5	34.9
84.6	225.8	35
84.7	226.1	35
84.8	226.5	35
84.9	226.8	35
85	227.1	35.1
85.1	227.5	35.1
85.2	227.8	35.1
85.3	228.1	35.1
85.4	228.5	35.1
85.5	228.8	35.2
85.6	229.1	35.2
85.7	229.4	35.2
85.8	229.8	35.2
85.9	230.1	35.3
86	230.4	35.3
86.1	230.8	35.3
86.2	231.1	35.3
86.3	231.4	35.4
86.4	231.7	35.4
86.5	232.1	35.4
86.6	232.4	35.4
86.7	232.7	35.4
86.8	233.1	35.5
86.9	233.4	35.5
87	233.7	35.5
87.1	234.1	35.5
87.2	234.4	35.6
87.3	234.7	35.6
87.4	235	35.6
87.5	235.4	35.6
87.6	235.7	35.7
87.7	236	35.7
87.8	236.4	35.7
87.9	236.7	35.7
88	237	35.7
88.1	237.4	35.8
88.2	237.7	35.8
88.3	238	35.8
88.4	238.3	35.8
88.5	238.7	35.9
88.6	239	35.9
88.7	239.3	35.9
88.8	239.7	35.9
88.9	240	35.9
89	240.3	36
89.1	240.6	36
89.2	241	36
89.3	241.3	36
89.4	241.6	36.1
89.5	242	36.1
89.6	242.3	36.1
89.7	242.6	36.1
89.8	243	36.2
89.9	243.3	36.2
90	243.6	36.2
90.1	243.9	36.2
90.2	244.3	36.2
90.3	244.6	36.3
90.4	244.9	36.3
90.5	245.3	36.3
90.6	245.6	36.3
90.7	245.9	36.4
90.8	246.2	36.4
90.9	246.6	36.4
91	246.9	36.4
91.1	247.2	36.4
91.2	247.6	36.5
91.3	247.9	36.5
91.4	248.2	36.5
91.5	248.6	36.5
91.6	248.9	36.6
91.7	249.2	36.6
91.8	249.5	36.6
91.9	249.9	36.6
92	250.2	36.7
92.1	250.5	36.7
92.2	250.9	36.7
92.3	251.2	36.7
92.4	251.5	36.7
92.5	251.9	36.8
92.6	252.2	36.8
92.7	252.5	36.8
92.8	252.8	36.8
92.9	253.2	36.9
93	253.5	36.9
93.1	253.8	36.9
93.2	254.2	36.9
93.3	254.5	36.9
93.4	254.8	37
93.5	255.1	37
93.6	255.5	37
93.7	255.8	37
93.8	256.1	37.1
93.9	256.5	37.1
94	256.8	37.1
94.1	257.1	37.1
94.2	257.5	37.2
94.3	257.8	37.2
94.4	258.1	37.2
94.5	258.4	37.2
94.6	258.8	37.2
94.7	259.1	37.3
94.8	259.4	37.3
94.9	259.8	37.3
95	260.1	37.3
95.1	260.4	37.4
95.2	260.7	37.4
95.3	261.1	37.4
95.4	261.4	37.4
95.5	261.7	37.4
95.6	262.1	37.5
95.7	262.4	37.5
95.8	262.7	37.5
95.9	263.1	37.5
96	263.4	37.6
96.1	263.7	37.6
96.2	264	37.6
96.3	264.4	37.6
96.4	264.7	37.7
96.5	265	37.7
96.6	265.4	37.7
96.7	265.7	37.7
96.8	266	37.7
96.9	266.4	37.8
97	266.7	37.8
97.1	267	37.8
97.2	267.3	37.8
97.3	267.7	37.9
97.4	268	37.9
97.5	268.3	37.9
97.6	268.7	37.9
97.7	269	37.9
97.8	269.3	38
97.9	269.6	38
98	270	38
98.1	270.3	38
98.2	270.6	38.1
98.3	271	38.1
98.4	271.3	38.1
98.5	271.6	38.1
98.6	272	38.2
98.7	272.3	38.2
98.8	272.6	38.2
98.9	272.9	38.2
99	273.3	38.2
99.1	273.6	38.3
99.2	273.9	38.3
99.3	274.3	38.3
99.4	274.6	38.3
99.5	274.9	38.4
99.6	275.2	38.4
99.7	275.6	38.4
99.8	275.9	38.4
99.9	276.2	38.4
100	276.6	38.5
100.1	276.9	38.5
100.2	277.2	38.5
100.3	277.6	38.5
100.4	277.9	38.6
100.5	278.2	38.6
100.6	278.5	38.6
100.7	278.9	38.6
100.8	279.2	38.7
100.9	279.5	38.7
101	279.9	38.7
101.1	280.2	38.7
101.2	280.5	38.7
101.3	280.9	38.8
101.4	281.2	38.8
101.5	281.5	38.8
101.6	281.8	38.8
101.7	282.2	38.9
101.8	282.5	38.9
101.9	282.8	38.9
102	283.2	38.9
102.1	283.5	39
102.2	283.8	39
102.3	284.1	39
102.4	284.5	39
102.5	284.8	39
102.6	285.1	39.1
102.7	285.5	39.1
102.8	285.8	39.1
102.9	286.1	39.1
103	286.5	39.2
103.1	286.8	39.2
103.2	287.1	39.2
103.3	287.4	39.2
103.4	287.8	39.2
103.5	288.1	39.3
103.6	288.4	39.3
103.7	288.8	39.3
103.8	289.1	39.3
103.9	289.4	39.4
104	289.7	39.4
104.1	290.1	39.4
104.2	290.4	39.4
104.3	290.7	39.5
104.4	291.1	39.5
104.5	291.4	39.5
104.6	291.7	39.5
104.7	292.1	39.5
104.8	292.4	39.6
104.9	292.7	39.6
105	293	39.6
105.1	293.4	39.6
105.2	293.7	39.7
105.3	294	39.7
105.4	294.4	39.7
105.5	294.7	39.7
105.6	295	39.7
105.7	295.4	39.8
105.8	295.7	39.8
105.9	296	39.8
106	296.3	39.8
106.1	296.7	39.9
106.2	297	39.9
106.3	297.3	39.9
106.4	297.7	39.9
106.5	298	40
106.6	298.3	40
106.7	298.6	40
106.8	299	40
106.9	299.3	40
107	299.6	40.1
107.1	300	40.1
107.2	300.3	40.1
107.3	300.6	40.1
107.4	301	40.2
107.5	301.3	40.2
107.6	301.6	40.2
107.7	301.9	40.2
107.8	302.3	40.2
107.9	302.6	40.3
108	302.9	40.3
108.1	303.3	40.3
108.2	303.6	40.3
108.3	303.9	40.4
108.4	304.3	40.4
108.5	304.6	40.4
108.6	304.9	40.4
108.7	305.2	40.5
108.8	305.6	40.5
108.9	305.9	40.5
109	306.2	40.5
109.1	306.6	40.5
109.2	306.9	40.6
109.3	307.2	40.6
109.4	307.5	40.6
109.5	307.9	40.6
109.6	308.2	40.7
109.7	308.5	40.7
109.8	308.9	40.7
109.9	309.2	40.7
110	309.5	40.7
110.1	309.9	40.8
110.2	310.2	40.8
110.3	310.5	40.8
110.4	310.8	40.8
110.5	311.2	40.9
110.6	311.5	40.9
110.7	311.8	40.9
110.8	312.2	40.9
110.9	312.5	41
111	312.8	41
111.1	313.1	41
111.2	313.5	41
111.3	313.8	41
111.4	314.1	41.1
111.5	314.5	41.1
111.6	314.8	41.1
111.7	315.1	41.1
111.8	315.5	41.2
111.9	315.8	41.2
112	316.1	41.2
112.1	316.4	41.2
112.2	316.8	41.2
112.3	317.1	41.3
112.4	317.4	41.3
112.5	317.8	41.3
112.6	318.1	41.3
112.7	318.4	41.4
112.8	318.8	41.4
112.9	319.1	41.4
113	319.4	41.4
113.1	319.7	41.5
113.2	320.1	41.5
113.3	320.4	41.5
113.4	320.7	41.5
113.5	321.1	41.5
113.6	321.4	41.6
113.7	321.7	41.6
113.8	322	41.6
113.9	322.4	41.6
114	322.7	41.7
114.1	323	41.7
114.2	323.4	41.7
114.3	323.7	41.7
114.4	324	41.7
114.5	324.4	41.8
114.6	324.7	41.8
114.7	325	41.8
114.8	325.3	41.8
114.9	325.7	41.9
115	326	41.9
115.1	326.3	41.9
115.2	326.7	41.9
115.3	327	42
115.4	327.3	42
115.5	327.6	42
115.6	328	42
115.7	328.3	42
115.8	328.6	42.1
115.9	329	42.1
116	329.3	42.1
116.1	329.6	42.1
116.2	330	42.2
116.3	330.3	42.2
116.4	330.6	42.2
116.5	330.9	42.2
116.6	331.3	42.3
116.7	331.6	42.3
116.8	331.9	42.3
116.9	332.3	42.3
117	332.6	42.3
117.1	332.9	42.4
117.2	333.3	42.4
117.3	333.6	42.4
117.4	333.9	42.4
117.5	334.2	42.5
117.6	334.6	42.5
117.7	334.9	42.5
117.8	335.2	42.5
117.9	335.6	42.5
118	335.9	42.6
118.1	336.2	42.6
118.2	336.5	42.6
118.3	336.9	42.6
118.4	337.2	42.7
118.5	337.5	42.7
118.6	337.9	42.7
118.7	338.2	42.7
118.8	338.5	42.8
118.9	338.9	42.8
119	339.2	42.8
119.1	339.5	42.8
119.2	339.8	42.8
119.3	340.2	42.9
119.4	340.5	42.9
119.5	340.8	42.9
119.6	341.2	42.9
119.7	341.5	43
119.8	341.8	43
119.9	342.1	43
120	342.5	43
120.1	342.8	43
120.2	343.1	43.1
120.3	343.5	43.1
120.4	343.8	43.1
120.5	344.1	43.1
120.6	344.5	43.2
120.7	344.8	43.2
120.8	345.1	43.2
120.9	345.4	43.2
121	345.8	43.3
121.1	346.1	43.3
121.2	346.4	43.3
121.3	346.8	43.3
121.4	347.1	43.3
121.5	347.4	43.4
121.6	347.8	43.4
121.7	348.1	43.4
121.8	348.4	43.4
121.9	348.7	43.5
122	349.1	43.5
122.1	349.4	43.5
122.2	349.7	43.5
122.3	350.1	43.5
122.4	350.4	43.6
122.5	350.7	43.6
122.6	351	43.6
122.7	351.4	43.6
122.8	351.7	43.7
122.9	352	43.7
123	352.4	43.7
123.1	352.7	43.7
123.2	353	43.8
123.3	353.4	43.8
123.4	353.7	43.8
123.5	354	43.8
123.6	354.3	43.8
123.7	354.7	43.9
123.8	355	43.9
123.9	355.3	43.9
124	355.7	43.9
124.1	356	43.9
124.2	356.3	43.9
124.3	356.7	43.9
124.4	357	43.9
124.5	357.3	43.9
124.6	357.7	43.9
124.7	358	43.9
124.8	358.3	43.9
124.9	358.7	43.9
125	359	43.9
125.1	359.3	43.9
125.2	359.7	43.9
125.3	360	43.9
125.4	360.3	43.9
125.5	360.7	43.8
125.6	361	43.8
125.7	361.3	43.8
125.8	361.7	43.8
125.9	362	43.8
126	362.3	43.8
126.1	362.7	43.8
126.2	363	43.8
126.3	363.3	43.8
126.4	363.7	43.8
126.5	364	43.8
126.6	364.3	43.8
126.7	364.7	43.8
126.8	365	43.8
126.9	365.3	43.8
127	365.7	43.8
127.1	366	43.8
127.2	366.3	43.8
127.3	366.7	43.7
127.4	367	43.7
127.5	367.3	43.7
127.6	367.7	43.7
127.7	368	43.7
127.8	368.3	43.7
127.9	368.7	43.7
128	369	43.7
128.1	369.3	43.7
128.2	369.7	43.7
128.3	370	43.7
128.4	370.3	43.7
128.5	370.7	43.7
128.6	371	43.7
128.7	371.3	43.7
128.8	371.7	43.7
128.9	372	43.7
129	372.3	43.6
129.1	372.7	43.6
129.2	373	43.6
129.3	373.3	43.6
129.4	373.7	43.6
129.5	374	43.6
129.6	374.3	43.6
129.7	374.7	43.6
129.8	375	43.6
129.9	375.3	43.6
130	375.7	43.6
130.1	376	43.6
130.2	376.3	43.6
130.3	376.7	43.6
130.4	377	43.6
130.5	377.3	43.6
130.6	377.7	43.6
130.7	378	43.6
130.8	378.3	43.5
130.9	378.7	43.5
131	379	43.5
131.1	379.3	43.5
131.2	379.7	43.5
131.3	380	43.5
131.4	380.3	43.5
131.5	380.7	43.5
131.6	381	43.5
131.7	381.3	43.5
131.8	381.7	43.5
131.9	382	43.5
132	382.3	43.5
132.1	382.7	43.5
132.2	383	43.5
132.3	383.4	43.5
132.4	383.7	43.5
132.5	384	43.4
132.6	384.4	43.4
132.7	384.7	43.4
132.8	385	43.4
132.9	385.4	43.4
133	385.7	43.4
133.1	386	43.4
133.2	386.4	43.4
133.3	386.7	43.4
133.4	387	43.4
133.5	387.4	43.4
133.6	387.7	43.4
133.7	388	43.4
133.8	388.4	43.4
133.9	388.7	43.4
134	389	43.4
134.1	389.4	43.4
134.2	389.7	43.4
134.3	390	43.3
134.4	390.4	43.3
134.5	390.7	43.3
134.6	391	43.3
134.7	391.4	43.3
134.8	391.7	43.3
134.9	392	43.3
135	392.4	43.3
135.1	392.7	43.3
135.2	393	43.3
135.3	393.4	43.3
135.4	393.7	43.3
135.5	394	43.3
135.6	394.4	43.3
135.7	394.7	43.3
135.8	395	43.3
135.9	395.4	43.3
136	395.7	43.2
136.1	396	43.2
136.2	396.4	43.2
136.3	396.7	43.2
136.4	397	43.2
136.5	397.4	43.2
136.6	397.7	43.2
136.7	398	43.2
136.8	398.4	43.2
136.9	398.7	43.2
137	399	43.2
137.1	399.4	43.2
137.2	399.7	43.2
137.3	400	43.2
137.4	400.4	43.2
137.5	400.7	43.2
137.6	401	43.2
137.7	401.4	43.2
137.8	401.7	43.1
137.9	402	43.1
138	402.4	43.1
138.1	402.7	43.1
138.2	403	43.1
138.3	403.4	43.1
138.4	403.7	43.1
138.5	404	43.1
138.6	404.4	43.1
138.7	404.7	43.1
138.8	405	43.1
138.9	405.4	43.1
139	405.7	43.1
139.1	406	43.1
139.2	406.4	43.1
139.3	406.7	43.1
139.4	407	43.1
139.5	407.4	43
139.6	407.7	43
139.7	408	43
139.8	408.4	43
139.9	408.7	43
140	409	43
140.1	409.4	43
140.2	409.7	43
140.3	410	43
140.4	410.4	43
140.5	410.7	43
140.6	411	43
140.7	411.4	43
140.8	411.7	43
140.9	412	43
141	412.4	43
141.1	412.7	43
141.2	413	42.9
141.3	413.4	42.9
141.4	413.7	42.9
141.5	414	42.9
141.6	414.4	42.9
141.7	414.7	42.9
141.8	415	42.9
141.9	415.4	42.9
142	415.7	42.9
142.1	416	42.9
142.2	416.4	42.9
142.3	416.7	42.9
142.4	417	42.9
142.5	417.4	42.9
142.6	417.7	42.9
142.7	418	42.9
142.8	418.4	42.9
142.9	418.7	42.9
143	419	42.8
143.1	419.4	42.8
143.2	419.7	42.8
143.3	420	42.8
143.4	420.4	42.8
143.5	420.7	42.8
143.6	421.1	42.8
143.7	421.4	42.8
143.8	421.7	42.8
143.9	422.1	42.8
144	422.4	42.8
144.1	422.7	42.8
144.2	423.1	42.8
144.3	423.4	42.8
144.4	423.7	42.8
144.5	424.1	42.8
144.6	424.4	42.8
144.7	424.7	42.7
144.8	425.1	42.7
144.9	425.4	42.7
145	425.7	42.7
145.1	426.1	42.7
145.2	426.4	42.7
145.3	426.7	42.7
145.4	427.1	42.7
145.5	427.4	42.7
145.6	427.7	42.7
145.7	428.1	42.7
145.8	428.4	42.7
145.9	428.7	42.7
146	429.1	42.7
146.1	429.4	42.7
146.2	429.7	42.7
146.3	430.1	42.7
146.4	430.4	42.7
146.5	430.7	42.6
146.6	431.1	42.6
146.7	431.4	42.6
146.8	431.7	42.6
146.9	432.1	42.6
147	432.4	42.6
147.1	432.7	42.6
147.2	433.1	42.6
147.3	433.4	42.6
147.4	433.7	42.6
147.5	434.1	42.6
147.6	434.4	42.6
147.7	434.7	42.6
147.8	435.1	42.6
147.9	435.4	42.6
148	435.7	42.6
148.1	436.1	42.6
148.2	436.4	42.5
148.3	436.7	42.5
148.4	437.1	42.5
148.5	437.4	42.5
148.6	437.7	42.5
148.7	438.1	42.5
148.8	438.4	42.5
148.9	438.7	42.5
149	439.1	42.5
149.1	439.4	42.5
149.2	439.7	42.5
149.3	440.1	42.5
149.4	440.4	42.5
149.5	440.7	42.5
149.6	441.1	42.5
149.7	441.4	42.5
149.8	441.7	42.5
149.9	442.1	42.5
150	442.4	42.4
150.1	442.7	42.4
150.2	443.1	42.4
150.3	443.4	42.4
150.4	443.7	42.4
150.5	444.1	42.4
150.6	444.4	42.4
150.7	444.7	42.4
150.8	445.1	42.4
150.9	445.4	42.4
151	445.7	42.4
151.1	446.1	42.4
151.2	446.4	42.4
151.3	446.7	42.4
151.4	447.1	42.4
151.5	447.4	42.4
151.6	447.7	42.4
151.7	448.1	42.3
151.8	448.4	42.3
151.9	448.7	42.3
152	449.1	42.3
152.1	449.4	42.3
152.2	449.7	42.3
152.3	450.1	42.3
152.4	450.4	42.3
152.5	450.7	42.3
152.6	451.1	42.3
152.7	451.4	42.3
152.8	451.7	42.3
152.9	452.1	42.3
153	452.4	42.3
153.1	452.7	42.3
153.2	453.1	42.3
153.3	453.4	42.3
153.4	453.7	42.3
153.5	454.1	42.2
153.6	454.4	42.2
153.7	454.7	42.2
153.8	455.1	42.2
153.9	455.4	42.2
154	455.7	42.2
154.1	456.1	42.2
154.2	456.4	42.2
154.3	456.7	42.2
154.4	457.1	42.2
154.5	457.4	42.2
154.6	457.7	42.2
154.7	458.1	42.2
154.8	458.4	42.2
154.9	458.7	42.2
155	459.1	42.2
155.1	459.4	42.2
155.2	459.8	42.1
155.3	460.1	42.1
155.4	460.4	42.1
155.5	460.8	42.1
155.6	461.1	42.1
155.7	461.4	42.1
155.8	461.8	42.1
155.9	462.1	42.1
156	462.4	42.1
156.1	462.8	42.1
156.2	463.1	42.1
156.3	463.4	42.1
156.4	463.8	42.1
156.5	464.1	42.1
156.6	464.4	42.1
156.7	464.8	42.1
156.8	465.1	42.1
156.9	465.4	42.1
157	465.8	42
157.1	466.1	42
157.2	466.4	42
157.3	466.8	42
157.4	467.1	42
157.5	467.4	42
157.6	467.8	42
157.7	468.1	42
157.8	468.4	42
157.9	468.8	42
158	469.1	42
158.1	469.4	42
158.2	469.8	42
158.3	470.1	42
158.4	470.4	42
158.5	470.8	42
158.6	471.1	42
158.7	471.4	41.9
158.8	471.8	41.9
158.9	472.1	41.9
159	472.4	41.9
159.1	472.8	41.9
159.2	473.1	41.9
159.3	473.4	41.9
159.4	473.8	41.9
159.5	474.1	41.9
159.6	474.4	41.9
159.7	474.8	41.9
159.8	475.1	41.9
159.9	475.4	41.9
160	475.8	41.9
160.1	476.1	41.9
160.2	476.4	41.9
160.3	476.8	41.9
160.4	477.1	41.9
160.5	477.4	41.8
160.6	477.8	41.8
160.7	478.1	41.8
160.8	478.4	41.8
160.9	478.8	41.8
161	479.1	41.8
161.1	479.4	41.8
161.2	479.8	41.8
161.3	480.1	41.8
161.4	480.4	41.8
161.5	480.8	41.8
161.6	481.1	41.8
161.7	481.4	41.8
161.8	481.8	41.8
161.9	482.1	41.8
162	482.4	41.8
162.1	482.8	41.8
162.2	483.1	41.7
162.3	483.4	41.7
162.4	483.8	41.7
162.5	484.1	41.7
162.6	484.4	41.7
162.7	484.8	41.7
162.8	485.1	41.7
162.9	485.4	41.7
163	485.8	41.7
163.1	486.1	41.7
163.2	486.4	41.7
163.3	486.8	41.7
163.4	487.1	41.7
163.5	487.4	41.7
163.6	487.8	41.7
163.7	488.1	41.7
163.8	488.4	41.7
163.9	488.8	41.7
164	489.1	41.6
164.1	489.4	41.6
164.2	489.8	41.6
164.3	490.1	41.6
164.4	490.4	41.6
164.5	490.8	41.6
164.6	491.1	41.6
164.7	491.4	41.6
164.8	491.8	41.6
164.9	492.1	41.6
165	492.4	41.6
165.1	492.8	41.6
165.2	493.1	41.6
165.3	493.4	41.6
165.4	493.8	41.6
165.5	494.1	41.6
165.6	494.4	41.6
165.7	494.8	41.5
165.8	495.1	41.5
165.9	495.4	41.5
166	495.8	41.5
166.1	496.1	41.5
166.2	496.4	41.5
166.3	496.8	41.5
166.4	497.1	41.5
166.5	497.5	41.5
166.6	497.8	41.5
166.7	498.1	41.5
166.8	498.5	41.5
166.9	498.8	41.5
167	499.1	41.5
167.1	499.5	41.5
167.2	499.8	41.5
167.3	500.1	41.5
167.4	500.5	41.5
167.5	500.8	41.4
167.6	501.1	41.4
167.7	501.5	41.4
167.8	501.8	41.4
167.9	502.1	41.4
168	502.5	41.4
168.1	502.8	41.4
168.2	503.1	41.4
168.3	503.5	41.4
168.4	503.8	41.4
168.5	504.1	41.4
168.6	504.5	41.4
168.7	504.8	41.4
168.8	505.1	41.4
168.9	505.5	41.4
169	505.8	41.4
169.1	506.1	41.4
169.2	506.5	41.3
169.3	506.8	41.3
169.4	507.1	41.3
169.5	507.5	41.3
169.6	507.8	41.3
169.7	508.1	41.3
169.8	508.5	41.3
169.9	508.8	41.3
170	509.1	41.3
170.1	509.5	41.3
170.2	509.8	41.3
170.3	510.1	41.3
170.4	510.5	41.3
170.5	510.8	41.3
170.6	511.1	41.3
170.7	511.5	41.3
170.8	511.8	41.3
170.9	512.1	41.2
171	512.5	41.2
171.1	512.8	41.2
171.2	513.1	41.2
171.3	513.5	41.2
171.4	513.8	41.2
171.5	514.1	41.2
171.6	514.5	41.2
171.7	514.8	41.2
171.8	515.1	41.2
171.9	515.5	41.2
172	515.8	41.2
172.1	516.1	41.2
172.2	516.5	41.2
172.3	516.8	41.2
172.4	517.1	41.2
172.5	517.5	41.2
172.6	517.8	41.2
172.7	518.1	41.1
172.8	518.5	41.1
172.9	518.8	41.1
173	519.1	41.1
173.1	519.5	41.1
173.2	519.8	41.1
173.3	520.1	41.1
173.4	520.5	41.1
173.5	520.8	41.1
173.6	521.1	41.1
173.7	521.5	41.1
173.8	521.8	41.1
173.9	522.1	41.1
174	522.5	41.1
174.1	522.8	41.1
174.2	523.1	41.1
174.3	523.5	41.1
174.4	523.8	41
174.5	524.1	41
174.6	524.5	41
174.7	524.8	41
174.8	525.1	41
174.9	525.5	41
175	525.8	41
175.1	526.1	41
175.2	526.5	41
175.3	526.8	41
175.4	527.1	41
175.5	527.5	41
175.6	527.8	41
175.7	528.1	41
175.8	528.5	41
175.9	528.8	41
176	529.1	41
176.1	529.5	41
176.2	529.8	40.9
176.3	530.1	40.9
176.4	530.5	40.9
176.5	530.8	40.9
176.6	531.1	40.9
176.7	531.5	40.9
176.8	531.8	40.9
176.9	532.1	40.9
177	532.5	40.9
177.1	532.8	40.9
177.2	533.1	40.9
177.3	533.5	40.9
177.4	533.8	40.9
177.5	534.1	40.9
177.6	534.5	40.9
177.7	534.8	40.9
177.8	535.1	40.9
177.9	535.5	40.8
178	535.8	40.8
178.1	536.2	40.8
178.2	536.5	40.8
178.3	536.8	40.8
178.4	537.2	40.8
178.5	537.5	40.8
178.6	537.8	40.8
178.7	538.2	40.8
178.8	538.5	40.8
178.9	538.8	40.8
179	539.2	40.8
179.1	539.5	40.8
179.2	539.8	40.8
179.3	540.2	40.8
179.4	540.5	40.8
179.5	540.8	40.8
179.6	541.2	40.8
179.7	541.5	40.7
179.8	541.8	40.7
179.9	542.2	40.7
180	542.5	40.7
180.1	542.8	40.7
180.2	543.2	40.7
180.3	543.5	40.7
180.4	543.8	40.7
180.5	544.2	40.7
180.6	544.5	40.7
180.7	544.8	40.7
180.8	545.2	40.7
180.9	545.5	40.7
181	545.8	40.7
181.1	546.2	40.7
181.2	546.5	40.7
181.3	546.8	40.7
181.4	547.2	40.6
181.5	547.5	40.6
181.6	547.8	40.6
181.7	548.2	40.6
181.8	548.5	40.6
181.9	548.8	40.6
182	549.2	40.6
182.1	549.5	40.6
182.2	549.8	40.6
182.3	550.2	40.6
182.4	550.5	40.6
182.5	550.8	40.6
182.6	551.2	40.6
182.7	551.5	40.6
182.8	551.8	40.6
182.9	552.2	40.6
183	552.5	40.6
183.1	552.8	40.6
183.2	553.2	40.5
183.3	553.5	40.5
183.4	553.8	40.5
183.5	554.2	40.5
183.6	554.5	40.5
183.7	554.8	40.5
183.8	555.2	40.5
183.9	555.5	40.5
184	555.8	40.5
184.1	556.2	40.5
184.2	556.5	40.5
184.3	556.8	40.5
184.4	557.2	40.5
184.5	557.5	40.5
184.6	557.8	40.5
184.7	558.2	40.5
184.8	558.5	40.5
184.9	558.8	40.4
185	559.2	40.4
185.1	559.5	40.4
185.2	559.8	40.4
185.3	560.2	40.4
185.4	560.5	40.4
185.5	560.8	40.4
185.6	561.2	40.4
185.7	561.5	40.4
185.8	561.8	40.4
185.9	562.2	40.4
186	562.5	40.4
186.1	562.8	40.4
186.2	563.2	40.4
186.3	563.5	40.4
186.4	563.8	40.4
186.5	564.2	40.4
186.6	564.5	40.4
186.7	564.8	40.3
186.8	565.2	40.3
186.9	565.5	40.3
187	565.8	40.3
187.1	566.2	40.3
187.2	566.5	40.3
187.3	566.8	40.3
187.4	567.2	40.3
187.5	567.5	40.3
187.6	567.8	40.3
187.7	568.2	40.3
187.8	568.5	40.3
187.9	568.8	40.3
188	569.2	40.3
188.1	569.5	40.3
188.2	569.8	40.3
188.3	570.2	40.3
188.4	570.5	40.2
188.5	570.8	40.2
188.6	571.2	40.2
188.7	571.5	40.2
188.8	571.8	40.2
188.9	572.2	40.2
189	572.5	40.2
189.1	572.8	40.2
189.2	573.2	40.2
189.3	573.5	40.2
189.4	573.8	40.2
189.5	574.2	40.2
189.6	574.5	40.2
189.7	574.9	40.2
189.8	575.2	40.2
189.9	575.5	40.2
190	575.9	40.2
190.1	576.2	40.2
190.2	576.5	40.1
190.3	576.9	40.1
190.4	577.2	40.1
190.5	577.5	40.1
190.6	577.9	40.1
190.7	578.2	40.1
190.8	578.5	40.1
190.9	578.9	40.1
191	579.2	40.1
191.1	579.5	40.1
191.2	579.9	40.1
191.3	580.2	40.1
191.4	580.5	40.1
191.5	580.9	40.1
191.6	581.2	40.1
191.7	581.5	40.1
191.8	581.9	40.1
191.9	582.2	40
192	582.5	40
192.1	582.9	40
192.2	583.2	40
192.3	583.5	40
192.4	583.9	40
192.5	584.2	40
192.6	584.5	40
192.7	584.9	40
192.8	585.2	40
192.9	585.5	40
193	585.9	40
193.1	586.2	40
193.2	586.5	40
193.3	586.9	40
193.4	587.2	40
193.5	587.5	40
193.6	587.9	40
193.7	588.2	39.9
193.8	588.5	39.9
193.9	588.9	39.9
194	589.2	39.9
194.1	589.5	39.9
194.2	589.9	39.9
194.3	590.2	39.9
194.4	590.5	39.9
194.5	590.9	39.9
194.6	591.2	39.9
194.7	591.5	39.9
194.8	591.9	39.9
194.9	592.2	39.9
195	592.5	39.9
195.1	592.9	39.9
195.2	593.2	39.9
195.3	593.5	39.9
195.4	593.9	39.8
195.5	594.2	39.8
195.6	594.5	39.8
195.7	594.9	39.8
195.8	595.2	39.8
195.9	595.5	39.8
196	595.9	39.8
196.1	596.2	39.8
196.2	596.5	39.8
196.3	596.9	39.8
196.4	597.2	39.8
196.5	597.5	39.8
196.6	597.9	39.8
196.7	598.2	39.8
196.8	598.5	39.8
196.9	598.9	39.8
197	599.2	39.8
197.1	599.5	39.7
197.2	599.9	39.7
197.3	600.2	39.7
197.4	600.5	39.7
197.5	600.9	39.7
197.6	601.2	39.7
197.7	601.5	39.7
197.8	601.9	39.7
197.9	602.2	39.7
198	602.5	39.7
198.1	602.9	39.7
198.2	603.2	39.7
198.3	603.5	39.7
198.4	603.9	39.7
198.5	604.2	39.7
198.6	604.5	39.7
198.7	604.9	39.7
198.8	605.2	39.7
198.9	605.5	39.6
199	605.9	39.6
199.1	606.2	39.6
199.2	606.5	39.6
199.3	606.9	39.6
199.4	607.2	39.6
199.5	607.5	39.6
199.6	607.9	39.6
199.7	608.2	39.6
[truncated: 6,243 more rows]
